# Supplementary material for: Bio-mimicking TiO2 architectures for enhanced photocatalytic activity under UV and visible light
Source: Royal Society of Chemistry journal article supplement (doi:10.1039/c7ra04185c), 2017-01-01
Supplement: c7ra04185c1.pdf [file c7ra04185c1.pdf]

## Bio-mimicked TiO<sub>2</sub> Architectures for Enhanced Photocatalytic Activity under UV and Visible Light

Iman Hashemizadeh<sup>a</sup>, Daniel C. W. Tsang<sup>b</sup>, Yun Hau Ng<sup>c,f</sup>, Zhijie Wu<sup>d</sup>, Vladimir Golovko<sup>e,\*</sup> and Alex C.K. Yip<sup>a,f,\*</sup>

<sup>a</sup>Department of Chemical and Process Engineering, University of Canterbury, Christchurch, New Zealand

<sup>b</sup>Department of Civil and Environmental Engineering, Hong Kong Polytechnic University, Hong Kong, China

<sup>c</sup>School of Chemical Engineering, University of New South Wales, Australia

<sup>d</sup>State Key Laboratory of Heavy Oil Processing and the Key Laboratory of Catalysis of CNPC, China University of Petroleum, Beijing, 102249, China

<sup>e</sup>Department of Chemistry, University of Canterbury, Christchurch, New Zealand

<sup>f</sup>The Joint Laboratory for Energy and Environmental Catalysis, City University of Hong Kong, Hong Kong, China

*\*Corresponding authors: alex.yip@canterbury.ac.nz and vladimir.golovko@canterbury.ac.nz*

## Supplementary Information

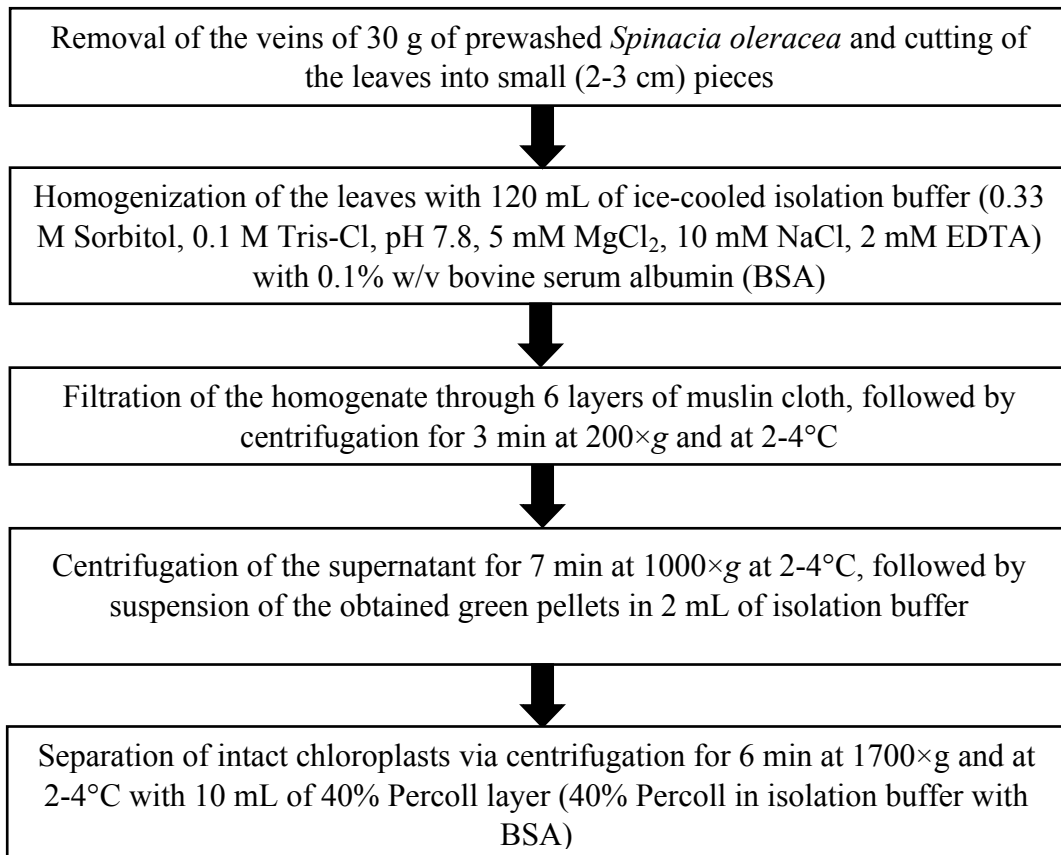

Scheme S1. Chloroplast isolation procedure; all steps were performed at 2-4°C.

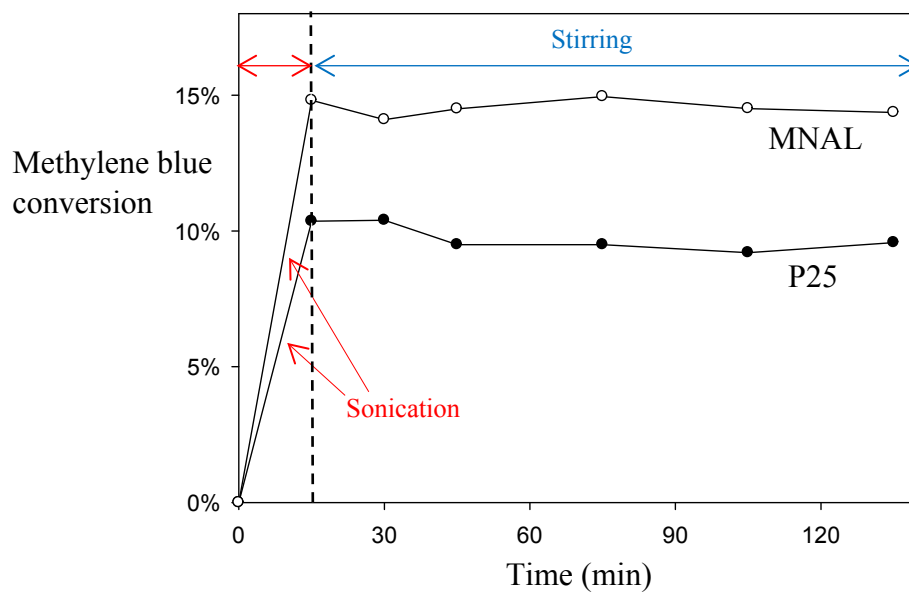

Figure S1. Adsorption of methylene blue under dark on the MNAL and the reference P25. The experimental conditions are 6.5 ppm dye solution, a catalyst loading of 150 mg cat./L, a pH of 7, 30°C.

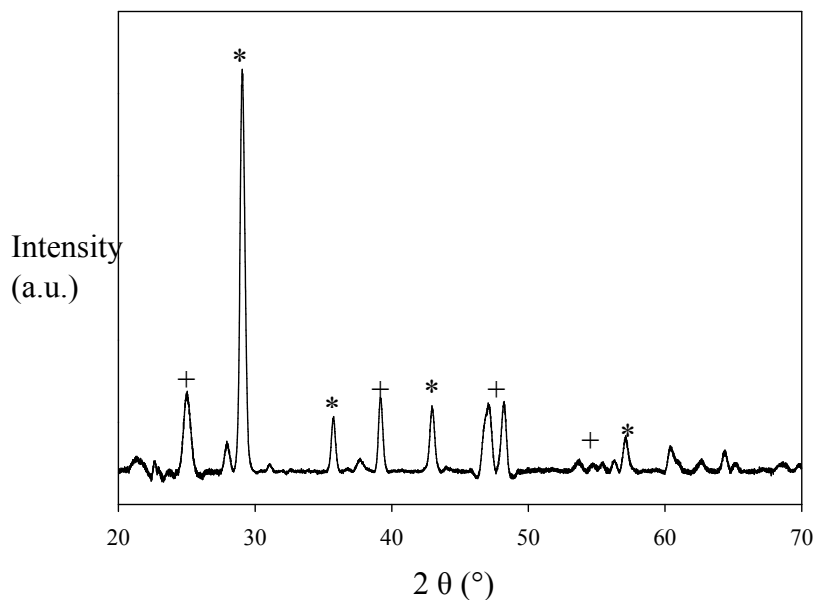

Figure S2. XRD pattern of the non-coated  $\text{Ti}^{3+}$  exchanged samples. Corresponding peaks of the anatase phase and the rutile phase  $\text{TiO}_2$  are marked by “+” and “\*”, respectively.

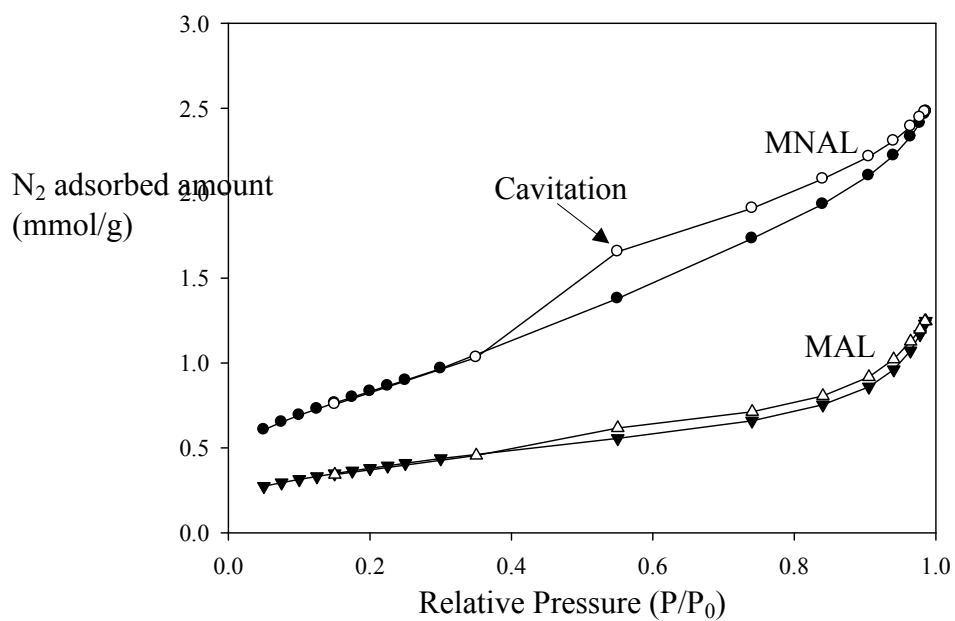

Figure S3. Nitrogen adsorption-desorption isotherm of the TiO<sub>2</sub> artificial leaves.

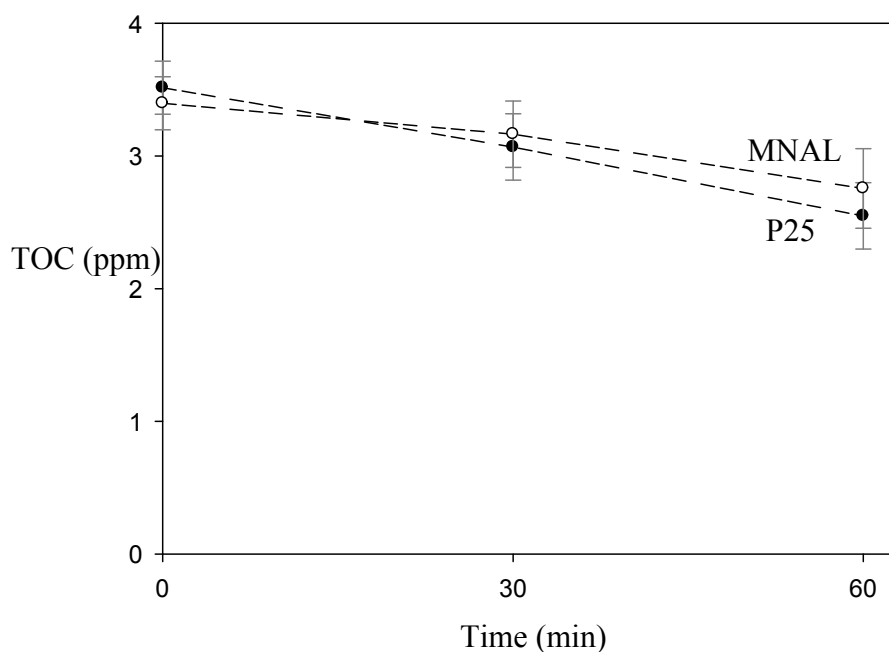

Figure S4. Total organic carbon (TOC) removal of methylene blue solution under UV light with a maximum intensity at 370 nm. The experimental conditions are 6.5 ppm dye solution, a catalyst loading of 150 mg cat/L, a pH of 7, 30°C. Note: the starting level of TOC reported

is slightly different due to the differences in efficiency of dye removal by adsorption in the dark.

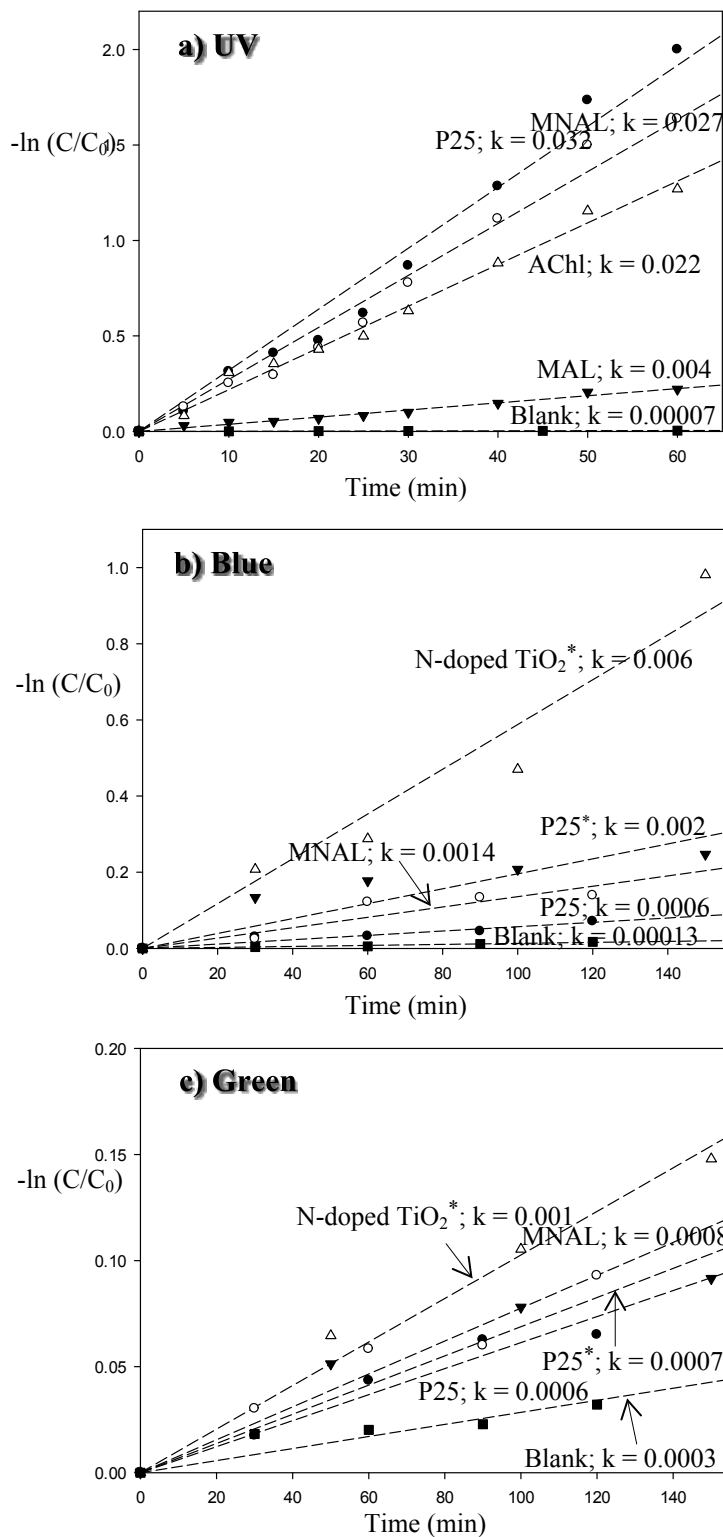

Figure S5. Apparent rate constants of methylene blue photodegradation under a) UV LEDs (370 nm), b) blue LEDs (440 nm) and c) green LEDs (515 nm). Notes: (i) The accuracy of all

experiments was verified and the relative error was less than 10%. (ii) The experimental data reported by Burda *et al.*<sup>100</sup> were used to estimate the apparent rate constants given by N-doped TiO<sub>2</sub>\* and P25\* TiO<sub>2</sub>.

Table S1. Energy-dispersive X-ray spectroscopy (EDS) results for the final catalysts.

| Content (wt %) | Ti   | O    | N   | P   | C <sup>†</sup> |
|----------------|------|------|-----|-----|----------------|
| MNAL           | 70.8 | 29.2 | --- | --- | ---            |
| MAL            | 67.3 | 32.2 | 0.6 | --- | ---            |
| AChI           | 72.3 | 27.2 | 0.4 | 0.2 | ---            |

<sup>†</sup>No carbon dopant was detected by EDS for all three bio-templated samples.

Table S2. Elemental composition (in atomic %) of the surface of the MNAL sample measured by XPS analysis.

| P          | Ca         | N          | O          |            |            | Ti         | C          |            |            |            |
|------------|------------|------------|------------|------------|------------|------------|------------|------------|------------|------------|
| (133.7 eV) | (347.7 eV) | (400.1 eV) | (530.2 eV) | (531.6 eV) | (532.8 eV) | (458.9 eV) | (284.8 eV) | (286.5 eV) | (288.6 eV) | (290.0 eV) |
| 1.11 %     | 2.57 %     | 0.49 %     | 49.08 %    | 8.95 %     | 4.17 %     | 24.82%     | 4.27 %     | 1.38 %     | 0.51 %     | 1.38 %     |

Table S3. Normalized results of methylene blue dye degradation.

| Sample name | BET (m <sup>2</sup> /g) | under UV (370 nm)        |                                  | under Blue (440 nm)      |                                  | under Green (515 nm)     |                                  |
|-------------|-------------------------|--------------------------|----------------------------------|--------------------------|----------------------------------|--------------------------|----------------------------------|
|             |                         | mg/g-cat. <sup>(a)</sup> | mg/m <sup>2</sup> <sup>(b)</sup> | mg/g-cat. <sup>(a)</sup> | mg/m <sup>2</sup> <sup>(b)</sup> | mg/g-cat. <sup>(a)</sup> | mg/m <sup>2</sup> <sup>(b)</sup> |
| P25         | 53                      | 37.3                     | 0.700                            | 3.1                      | 0.058                            | 2.7                      | 0.052                            |
| MNAL        | 66                      | 34.7                     | 0.530                            | 5.7                      | 0.086                            | 3.9                      | 0.060                            |
| MAL         | 30                      | 8.7                      | 0.290                            | 0.0                      | 0.000                            | ---                      | ---                              |
| AChl        | --- <sup>(c)</sup>      | 31.2                     | ---                              | ---                      | ---                              | ---                      | ---                              |

<sup>(a)</sup> Average dye conversion (mg) per gram of catalyst.

<sup>(b)</sup> Average dye conversion (mg) per m<sup>2</sup> of catalyst surface area.

<sup>(c)</sup> The surface area of the AChl was not measured because of the very low yield of the intact chloroplast cells isolation procedure.
